# Supplementary material for: A designable aminophenylboronic acid functionalized magnetic Fe3O4/ZIF-8/APBA for specific recognition of glycoproteins and glycopeptides
Source: Royal Society of Chemistry journal article supplement (doi:10.1039/c7ra12054k), 2018-01-01
Supplement: c7ra12054k1.pdf [file c7ra12054k1.pdf]

## Support Information

### **A designable aminophenylboronic acid functionalized magnetic Fe<sub>3</sub>O<sub>4</sub>/ZIF-8/APBA for specific recognition of glycoproteins and glycopeptides**

Shanshan Li, Dongyan Li\*, Long Sun, Yuewei Yao and Cheng Yao\*

School of Chemistry and Molecular Engineering, Nanjing Tech University, Nanjing 211816, China.

E-mail: lidongyan111@njtech.edu.cn; [yaocheng@njtech.edu.cn](mailto:yaocheng@njtech.edu.cn)

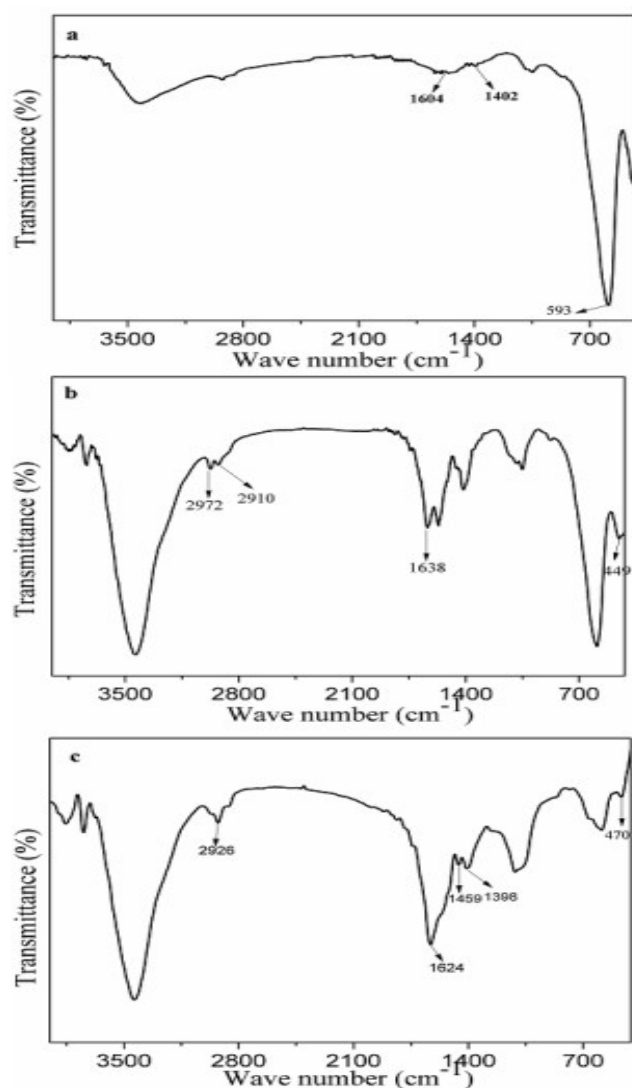

**FigureS1.** FT-IR spectra of  $\text{Fe}_3\text{O}_4$  (a),  $\text{Fe}_3\text{O}_4/\text{ZIF-8}$  (b), and  $\text{Fe}_3\text{O}_4/\text{ZIF-8}/\text{APBA}$  NPs (c).

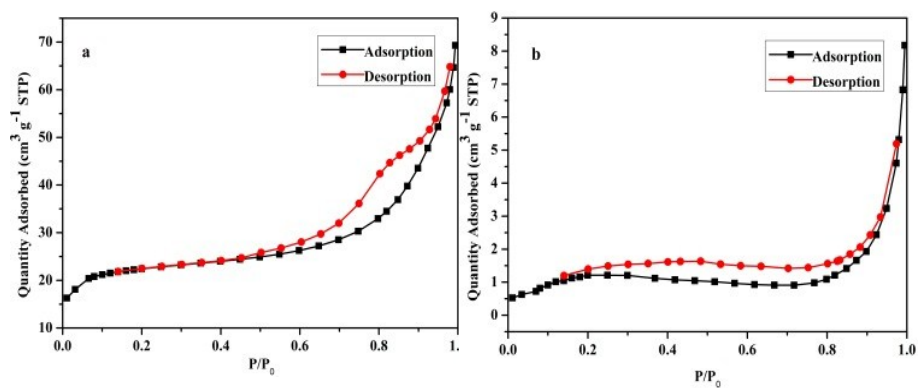

Figure S2.  $\text{N}_2$  sorption-desorption isotherms of the as-prepared  $\text{Fe}_3\text{O}_4/\text{ZIF-8}$  (a) and  $\text{Fe}_3\text{O}_4/\text{ZIF-8}/\text{APBA}$  (b) NPs measured at 77 K.

Table S1. Detailed information of the glycopeptides enriched by Fe<sub>3</sub>O<sub>4</sub>/ZIF-8/APBA from tryptic digestion of HRP.

| Peak number | Observed m/z | Glycan composition | Amino acid sequence <sup>[a]</sup> |
|-------------|--------------|--------------------|------------------------------------|
| H1          | 2533         | FucGlcNAc          | SFAN#STQTFNFAFVEAMDR               |
| H2          | 2594         | XylMan3FucGlcNAc2  | PTLN#TTYLQTLR                      |
| H3          | 2851         | FucGlcNAc          | GLIQSDQELFSSPN#ATDTIPLV<br>R       |
| H4          | 3323         | XylMan3FucGlcNAc2  | QLTPTFYDNPCPN#VSNIVR               |
| H5          | 3353         | XylMan3FucGlcNAc2  | SFAN#STQTFNFAFVEAMDR               |
| H6          | 3671         | XylMan3FucGlcNAc2  | GLIQSDQELFSSPN#ATDTIPLV<br>R       |

[a] The *N*-glycosylation sites are marked with N#. GlcNAc = *N*-acetylglucosamine, Man = mannose, Gal = galactose.
